# Supplementary material for: Rapid, energy-efficient and pseudomorphic microwave-induced-metal-plasma (MIMP) synthesis of Mg2Si and Mg2Ge
Source: Royal Society of Chemistry journal article supplement (doi:10.1039/d2ce00721e), 2022-01-01
Supplement: d2ce00721e1.pdf [file d2ce00721e1.pdf]

Electronic Supplementary Information:

**Rapid, Energy-Efficient and Pseudomorphic Microwave-Induced-Metal-Plasma  
(MIMP) Synthesis of Mg<sub>2</sub>Si and Mg<sub>2</sub>Ge**

Zhen Fan,<sup>a</sup> Hsi-Nien Ho,<sup>b</sup> Robert Szczęśny,<sup>c</sup> Wei-Ren Liu,<sup>b</sup> and Duncan H Gregory.\*<sup>a</sup>

a. WestCHEM, School of Chemistry, Joseph Black Building, University of Glasgow,  
Glasgow, G12 8QQ, United Kingdom.

b. Department of Chemical Engineering, Chung Yuan Christian University, R&D Center for  
Membrane Technology, Research Center for Circular Economy, 32023, No. 200, Chun Pei  
Rd., Chung Li District, Taoyuan City 32023, Taiwan.

c. Faculty of Chemistry, Nicolaus Copernicus University in Toruń, ul. Gagarina 7, 87-100  
Toruń, Poland.

\* Corresponding Author. Email: [Duncan.Gregory@glasgow.ac.uk](mailto:Duncan.Gregory@glasgow.ac.uk) Tel: +44-141-330-8128.

## 1. Supplementary SEM/EDS and SAED Results for Mg<sub>2</sub>Si

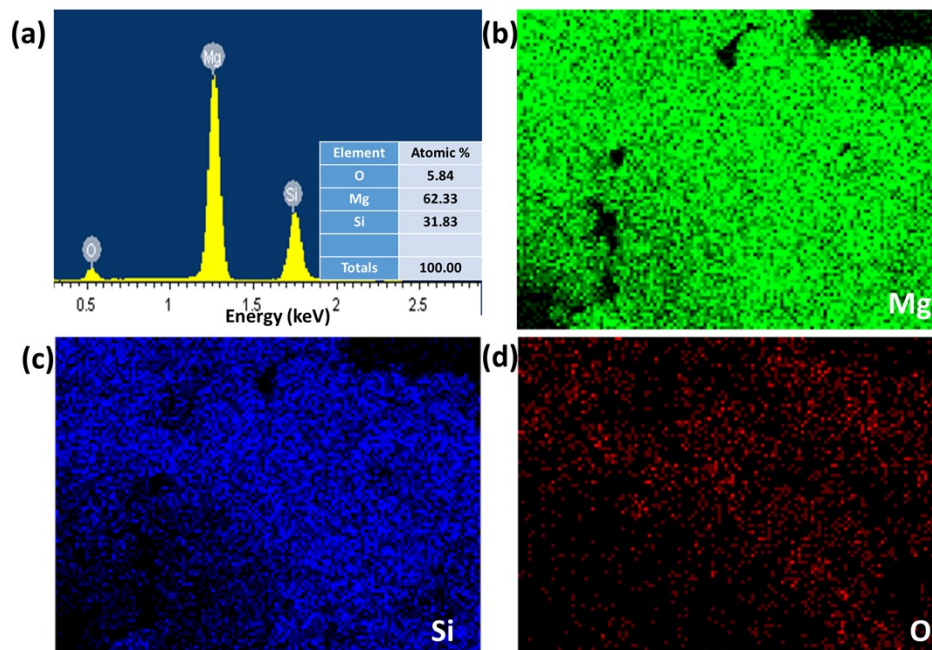

**Figure S1.** (a) The representative EDX spectrum corresponding to the SEM image in Figure 2d; and the corresponding (b-d) Elemental mappings of Mg, Si and O, respectively.

**Table S1.** Indexed lattice planes from the SAED patterns shown in Figure 1h.

| Diffraction No. | Indexed Diffraction Distance / nm | Lattice Plane – Mg <sub>2</sub> Si |
|-----------------|-----------------------------------|------------------------------------|
| 1               | 0.230                             | (220)                              |
| 2               | 0.190                             | (311)                              |
| 3               | 0.150                             | (331)                              |
| 4               | 0.120                             | (511)                              |
| 5               | 0.106                             | (531), (600)                       |
| 6               | 0.094                             | (533), (622)                       |

## 2. Structure of the Nanoporous Ge Reactant Powders

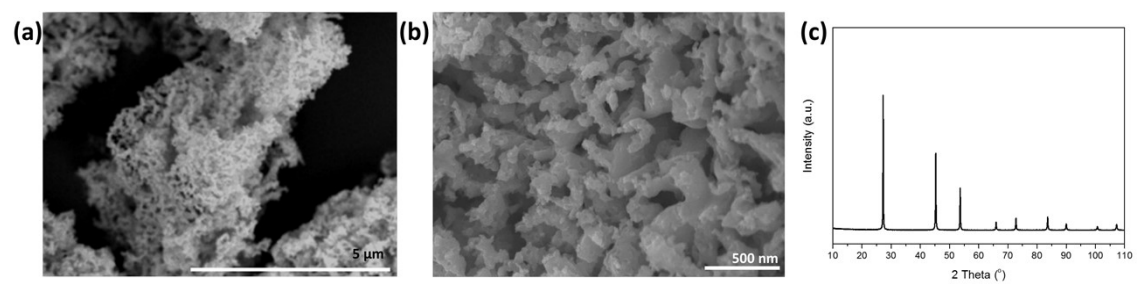

**Figure S2.** (a, b) SEM images and (c) PXRD patterns of the nanoporous Ge reactant powders.

### 3. Mg<sub>2</sub>Ge synthesized from Mg and Ge, irradiated for 30 s.

**Table S2.** Crystallographic data obtained from the Rietveld refinement of the MIMP-synthesised product of Mg<sub>2</sub>Ge with an irradiation time of 30 s (see also Figure 3a).

| Chemical Formula                        | Mg <sub>2</sub> Ge | Mg                              | Ge                   |
|-----------------------------------------|--------------------|---------------------------------|----------------------|
| Crystal System                          | Cubic              | Hexagonal                       | Cubic                |
| Space Group                             | <i>Fm-3m</i> (225) | <i>P6<sub>3</sub>/mmc</i> (194) | <i>Fd-3m</i> (227)   |
| Lattice Parameter / Å                   | 6.3935(2)          | 3.2124(5)<br>5.2136(17)         | 5.6568 <sup>a</sup>  |
| Cell Volume / Å <sup>3</sup>            | 261.349(22)        | 46.593(14)                      | 181.014 <sup>a</sup> |
| Formula Weight / g mol <sup>-1</sup>    | 484.800            | 48.610                          | 580.720              |
| Formula Units, <i>Z</i>                 | 4                  | 2                               | 8                    |
| Calculated Density / g cm <sup>-3</sup> | 3.080              | 1.732                           | 5.327                |
| Phase Fraction / wt. %                  | 94.3(3)            | 4.1(3)                          | 1.5(1)               |
| No. of Variables                        |                    | 19                              |                      |
| No. of Observations                     |                    | 2090                            |                      |
| <i>wRp</i>                              |                    | 0.2646                          |                      |
| <i>Rp</i>                               |                    | 0.1788                          |                      |
| $\chi^2$                                |                    | 1.960                           |                      |

<sup>a</sup>. Not refined.

**Table S3.** Atomic parameters for MIMP-synthesised Mg<sub>2</sub>Ge (irradiated for 30 s).

| Atom | Site       | <i>x</i> | <i>y</i> | <i>z</i> | 100 × <i>U</i> <sub>iso</sub> / Å <sup>2</sup> | SOF <sup>a</sup> |
|------|------------|----------|----------|----------|------------------------------------------------|------------------|
| Mg   | 8 <i>c</i> | 0.25     | 0.25     | 0.25     | 2.54(18)                                       | 1                |
| Ge   | 4 <i>a</i> | 0        | 0        | 0        | 2.24(12)                                       | 1                |

<sup>a</sup>. Not refined.

#### 4. MIMP-synthesised $\text{Mg}_2\text{Ge}$ from Commercial Bulk Ge Powders

In order to investigate between the premise that the reaction between Mg and nanoporous Ge was pseudomorphic, a supplementary MIMP synthesis was conducted. Commercial Ge powders (Trace metal basis, 99.999%, Acros Organics) were initially ground manually using a mortar and pestle. Mg powder (35 mg) and as-ground Ge powder (45 mg) were mixed thoroughly. The MW synthesis was performed with an incident power of 200 W for an irradiation time of 90 s under a static vacuum of  $P < 10^{-6}$  mbar. The Rietveld refinement results (Figure S3a; Table S4) confirmed the *antifluorite* structure of  $\text{Mg}_2\text{Ge}$  with a lattice parameter of  $a = 6.3894(4)$  Å. The refined phase fraction of the main phase was 95.9(4) wt.%, with the presence of small amounts of MgO (3.2(2) wt.%) and Ge (0.9(6) wt.%) impurity phases indicated. In contrast to the  $\text{Mg}_2\text{Ge}$  sample synthesised from nanoporous Ge starting material (Figures 4a,b), the STEM image in Figure S3b showed that the  $\text{Mg}_2\text{Ge}$  produced from commercial Ge was composed of dense bulk particles and was not porous.

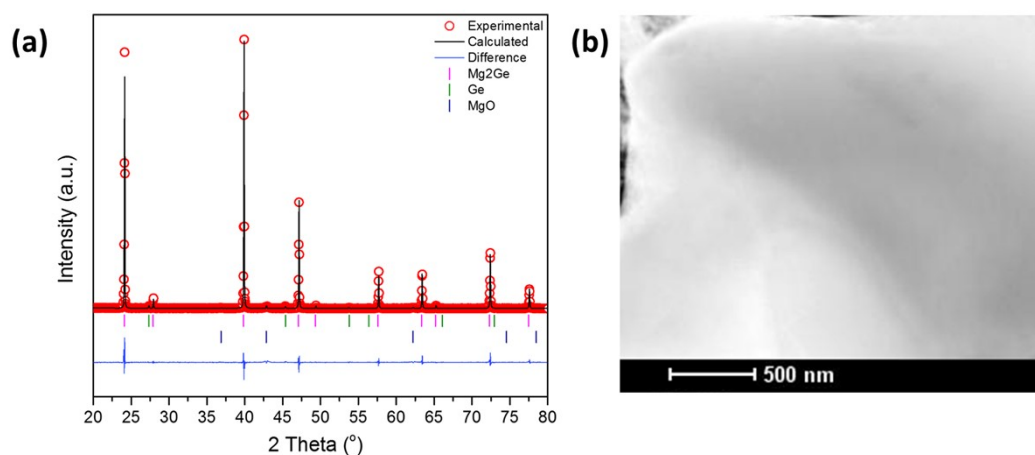

**Figure S3.** (a) Profile plot of the Rietveld refinement against PXRD data, and (b) a STEM image of the  $\text{Mg}_2\text{Ge}$  product as obtained from the MW synthesis experiment using a commercial Ge starting material, illustrating the relatively large particle size obtained.

**Table S4.** Crystallographic data obtained from the Rietveld refinement of the MIMP-synthesised Mg<sub>2</sub>Ge synthesised from commercial Ge powder (see also Figure S3a).

| <b>Chemical Formula</b>                 | <b>Mg<sub>2</sub>Ge</b> | <b>MgO</b>          | <b>Ge</b>            |
|-----------------------------------------|-------------------------|---------------------|----------------------|
| Crystal System                          | Cubic                   | Cubic               | Cubic                |
| Space Group                             | <i>Fm-3m</i> (225)      | <i>Fm-3m</i> (225)  | <i>Fd-3m</i> (227)   |
| Lattice Parameter / Å                   | 6.3894(4)               | 4.2170 <sup>a</sup> | 5.6568 <sup>a</sup>  |
| Cell volume / Å <sup>3</sup>            | 260.85(5)               | 74.991 <sup>a</sup> | 181.014 <sup>a</sup> |
| Formula Weight / g mol <sup>-1</sup>    | 484.800                 | 161.216             | 580.720              |
| Formula Units, <i>Z</i>                 | 4                       | 4                   | 8                    |
| Calculated Density / g cm <sup>-3</sup> | 3.086                   | 3.570               | 5.327                |
| Phase Fraction / wt.%                   | 95.9(4)                 | 3.2(2)              | 0.9(6)               |
| No. of Variables                        |                         | 27                  |                      |
| No. of Observations                     |                         | 2093                |                      |
| <i>wRp</i>                              |                         | 0.2071              |                      |
| <i>Rp</i>                               |                         | 0.1397              |                      |
| $\chi^2$                                |                         | 0.2199              |                      |

<sup>a</sup>. Not refined.

**Table S5.** Atomic parameters for MIMP-synthesised Mg<sub>2</sub>Ge from commercial Ge powder (see also Figure S3a).

| <b>Atom</b> | <b>Site</b> | <b><i>x</i></b> | <b><i>y</i></b> | <b><i>z</i></b> | <b>100 × <i>U</i><sub>iso</sub> / Å<sup>2</sup></b> | <b>SOF <sup>a</sup></b> |
|-------------|-------------|-----------------|-----------------|-----------------|-----------------------------------------------------|-------------------------|
| Mg          | 8 <i>c</i>  | 0.25            | 0.25            | 0.25            | 2.77(14)                                            | 1                       |
| Ge          | 4 <i>a</i>  | 0               | 0               | 0               | 2.26(9)                                             | 1                       |

<sup>a</sup>. Not refined.
